# Supplementary material
Source: PubMed Central journal article supplement (PMC6994160)

## Supplementary Figure legends

**Supplementary Figure 1. Characterization of polarized human Th17 and Th1 cells.** **(A)** Intracellular cytokine staining was performed for IL-17 by flow cytometry of HD (n = 6) and MS patients (n = 7). **(B)** Intracellular cytokine staining was performed for Th17 and Th1 cells by flow cytometry. **(C)** Quantification of IL17-producing and IL-17/IFN $\gamma$  producing cells. **(D)** mRNA analysis of the transcription factors *Tbx21*, *Rorc*, *Gata3* and *Foxp3* was performed in Th17 (n = 6) and Th1 cells (n = 6); normalized to  $\beta$ -actin. Error bars represent mean  $\pm$  SEM. \*, p < 0.05; n.s. = not significant, n.d. = not detectable, unpaired Student's t test [A], Mann-Whitney test [C].

**Supplementary Figure 2. No impact of glutaminase inhibition or culturing conditions on T cell differentiation and survival.** **(A)** Intracellular cytokine staining was performed for IFN $\gamma$ , IL-17, FoxP3 and Tbet on Th17 and Th1 cells  $\pm$  BPTES (each condition n=3) by flow cytometry. **(B)** Live-dead staining was performed by flow cytometry for indicated culture conditions showing no significant differences. Error bars represent mean  $\pm$  SEM. \*, p < 0.05; n.s. = not significant, one-way ANOVA with post-hoc Tukey test [A, B].

**Supplementary Figure 3. Th17 cells do not express classical neurotoxic molecules.** **(A)** Dot plot representative of FasL and Perforin expression by Th17-differentiated cells after 4 hours TCR stimulation measured by flow cytometry. **(B)** Intracellular cytokine staining was performed for CD4, IFN $\gamma$  and IL-17 on Th17 and Th1 cells. **(C)** mRNA analysis of the transcription factors *Tbet* and *Ror $\gamma$ t* was performed in Th17 cells (n = 6) in comparison to Th1 cells (n = 6). Bars indicate mean  $\pm$  SEM. n.d. = not detectable, unpaired Student's t test [B].

**Supplementary Figure 4. Expression of IL-17 and VAMP4 on murine Th17 cells.** **(A)** Immunocytochemical staining of CD4 and IL-17 on naïve (upper lane) and Th17-differentiated (lower lane) cells (scale bar = 5  $\mu$ m). Co-staining was performed with DAPI. **(B)** Polarized Th17 cells from IL-

17-EGFP mice were sorted into IL-17 producing (GFP+) and non-producing (GFP-) Th17 cells and western blotting stainings were performed for VAMP4 and GAPDH (one representative example out of three is shown).

**Supplementary Figure 5. Inflammatory cytokine production correlates with glutamate release. (A)**

Proliferation of differentiated Th17 cells over 72 hours was assessed by [3H]-thymidine labeling and by CFSE-proliferation assay (n = 9). **(B)** Cytokine production (pg/ml) by Th17-skewed cells secreted into the supernatant after 4 hours TCR stimulation measured by cytokine bead array (n = 3). **(C)** Correlation of proinflammatory cytokines IL-17 and TNF $\alpha$  (%) with glutamate secretion (in  $\mu$ M, n = 10-11). Error bars represent mean  $\pm$  SEM. **(D)** Immunohistochemical staining of Kv1.3 in healthy CNS tissue (upper row, scale bar = 50  $\mu$ m) and in infiltrated EAE lesions (lower row, scale bar = 15  $\mu$ m). Co-staining with NeuN and CD4 was performed. **(E)** Glutamate secretion levels of primary cortical neuronal cultures after 4-aminopyridine stimulation and MgTX after 24 hours (n = 6 per group). Bars indicate mean  $\pm$  SEM. \*, p < 0.05; ns, not significant, one-way ANOVA with post-hoc Tukey test [A, E], unpaired Student's t test [B], Spearman's rank correlation test [C].

**Supplementary Figure 6. Transfection efficiency of primary T lymphocytes. (A)** Murine Th17 cells were transfected with iGluSnFR. Live dead staining was performed and the transfection efficiency was evaluated via GFP by flow cytometry.

**Supplementary Figure 7. Stimulation of CD29 and VCAM1 does not alter T cell functionality. (A)**

Proliferation of differentiated Th17 cells  $\pm$  CD29 stimulating-Ab or  $\pm$  VCAM1 coating over 72 hours was assessed by CFSE-proliferation assay (n = 4). **(B)** Cytokine IL-17 production by Th17-skewed cells after 4 hours TCR stimulation measured by flow cytometry (n = 4). Bars indicate mean  $\pm$  SEM. ns = not significant, one-way ANOVA with post-hoc Tukey test [A, B].



## Supplementary Video legends

Supplementary Video 1. **Effect of MgTX in TN-XXL Rag<sup>-/-</sup> control conditions.** Intravital two-photon microscopy in the brain stem of living B6.Thy1-TN-XXLxRag2<sup>yc/-</sup> anaesthetized mice. Somata and axons are shown (TN-XXL = YFP, CFP; yellow, blue fluorescent proteins). Margatoxin (5  $\mu$ M) was puffed locally during imaging of control mice.

Supplementary Video 2. **K<sub>v</sub>1.3 blockade on Th17 cells reduces Ca<sup>2+</sup> elevations *in vivo* in EAE.** Passive EAE in B6.Thy1-TN-XXLxRag2<sup>yc/-</sup> mice was induced by transfer of 1x10<sup>7</sup> CD4<sup>+</sup>Th17 cells (B6.RFPx2D2) intravenously. At the peak of disease, intravital two-photon microscopy was performed in the brain stem of living anaesthetized mice. Immune cells (RFP, red fluorescent protein) infiltrate the upper brainstem region and show close proximity with somata and axons (TN-XXL = YFP, CFP; yellow, blue fluorescent proteins). Neuronal free Ca<sup>2+</sup> levels were assessed by FRET measurements (525 nm/475 nm ratio, false color coded representation). Margatoxin (5  $\mu$ M) was puffed locally during imaging of EAE mice (for better visualization: red puff at timepoint 35).

## Supplementary Tables

**Supplementary Table 1. Clinical and demographic information for patients and controls for CSF samples.**

|           | <b>NIND</b>   | <b>RRMS</b>    | <b>p-value</b> |
|-----------|---------------|----------------|----------------|
| n         | 14            | 16             |                |
| Age       | 49 (34; 55)   | 37 (27; 45.75) |                |
| Sex       | 2M 12F        | 5M 11F         | 0.9998         |
| Glutamate | 12.41 ± 1.581 | 11.35 ± 1.555  | 0.6106         |
| Glutamine | 612.8 ± 26.72 | 822.9 ± 83.58  | 0.0318         |

Human CSF samples were isolated from RRMS patients (n = 16) and non-inflammatory neurological disease patients (n = 14). The median (minimum, maximum) of the age and sex is shown. The glutamate and the glutamine levels (mean  $\mu\text{M}$ ,  $\pm\text{SEM}$ ) were assessed for each group.

**Supplementary Table 2. Clinical and demographic information for patients and controls for CD4<sup>+</sup> cells.**

|                       | <b>Healthy</b> | <b>MS</b>           | <b>p-value</b> |
|-----------------------|----------------|---------------------|----------------|
| n                     | 17             | 32                  |                |
| Age                   | 29 (26; 33)    | 36.5 (30.25; 48.50) |                |
| Sex                   | 5M 12F         | 12M 20F             |                |
| EDSS                  | N.A.           | 1 (0; 2)            |                |
| Disease Duration (yr) | N.A.           | 2 (1; 7)            |                |
| Glutamate             | 14.57 ± 1.923  | 21.42 ± 2.713       | 0.0924         |
| IL-17 %               | 1.034 ± 0.1541 | 0.8284 ± 0.2822     | 0.5836         |

Human CD4<sup>+</sup> cells (>98%) were isolated from PBMCs of healthy donors (n = 17) and MS patients (n = 32). The median (minimum, maximum) of the age, sex, Expanded Disability Status Scale (EDSS) score

and disease duration is shown. The glutamate secretion levels (mean  $\mu\text{M}$ ,  $\pm\text{SEM}$ ) and the IL-17 production (mean %,  $\pm\text{SEM}$ ) were assessed for each group.

**Supplementary Table 3. Clinical and demographic information for patients and controls for Th1 and Th17 cells.**

|                       | Healthy     | MS          | p-value |
|-----------------------|-------------|-------------|---------|
| n                     | 8           | 15          |         |
| Age                   | 30 (26; 36) | 32 (21; 53) |         |
| Sex                   | 4M 4F       | 6M 9F       | 0.90    |
| EDSS                  | N.A.        | 0 (0; 3.5)  |         |
| Disease Duration (yr) | N.A.        | 3 (1; 7)    |         |

Human CD4<sup>+</sup>IL-17<sup>+</sup> cells were isolated from PBMCs of healthy donors (n = 8) and MS patients (n= 15). The median (minimum, maximum) of the age, sex, Expanded Disability Status Scale (EDSS) score and disease duration is shown. The glutamate secretion levels (mean  $\mu\text{M}$ ,  $\pm\text{SEM}$ ) and the IL-17 production (mean %,  $\pm\text{SEM}$ ) were assessed for each group.

**Supplementary Table 4. qPCR primer information.**

| Official gene name                                                  | Primer name         | Primer sequence       |
|---------------------------------------------------------------------|---------------------|-----------------------|
| Homo sapiens actin, beta (AKTB)                                     | Hs- $\beta$ ACTIN-F | TTAGTTGCGTTACACCCTTTC |
|                                                                     | Hs- $\beta$ ACTIN-R | ACCTTCACCGTTCCAGTT    |
| Homo sapiens<br>glyceraldehyde-3-phosphate<br>dehydrogenase (GAPDH) | Hs-GAPDH-F          | TATGACAACAGCCTCAAG    |
|                                                                     | Hs-GAPDH-R          | TTCCACGATACCAAAGTT    |
| Homo sapiens<br>RPS13                                               | Hs-RPS13-F          | GAAAGGATAAGGATGCTAAA  |
|                                                                     | Hs-RPS13-R          | AGAGGCTGTAGATGATTC    |

|                                                                                          |                         |                               |
|------------------------------------------------------------------------------------------|-------------------------|-------------------------------|
| <b>Homo sapiens</b><br><b>Glutaminase</b>                                                | <b>Hs-GLUTAMINASE-F</b> | <b>TGTCTTCAGTCCTGTGTA</b>     |
|                                                                                          | <b>Hs-GLUTAMINASE-R</b> | <b>TGTGGTTTATCATCTTCATTC</b>  |
| <b>Homo sapiens</b><br><b>Kv1.3 (KCNA3)</b>                                              | <b>Hs-KCNA3-F</b>       | <b>TGAGTAAGTCGGAGTATA</b>     |
|                                                                                          | <b>Hs-KCNA3-R</b>       | <b>AAGAGTTGGGATTATTGT</b>     |
| <b>Homo sapiens</b><br><b>ATPase D2</b>                                                  | <b>Hs-ATPASED2-F</b>    | <b>ACTACTGATTATGGTAAC</b>     |
|                                                                                          | <b>Hs- ATPASED2-R</b>   | <b>ATATAGGTGAGAAATGTG</b>     |
| <b>Homo sapiens</b><br><b>Rorc</b>                                                       | <b>Hs-Rorc-F</b>        | <b>CTCCATCTTTGACTTCTC</b>     |
|                                                                                          | <b>Hs-Rorc-R</b>        | <b>GCTGTTCTACTTTCCTTT</b>     |
| <b>Homo sapiens</b><br><b>Gata3</b>                                                      | <b>Hs-Gata3-F</b>       | <b>AAATACTGAGAGAGGGAGAGA</b>  |
|                                                                                          | <b>Hs-Gata3-R</b>       | <b>GGTAGCGAAGAGCAGAGA</b>     |
| <b>Homo sapiens</b><br><b>Foxp3</b>                                                      | <b>Hs-Foxp3-F</b>       | <b>GGCACAATGTCTCCTCCAGAGA</b> |
|                                                                                          | <b>Hs-Foxp3-R</b>       | <b>CAGATGAAGCCTTGGTCAGTGC</b> |
| <b>Homo sapiens</b><br><b>Tbx21</b>                                                      | <b>Hs-Tbx21-F</b>       | <b>AATGTGACCCAGATGATT</b>     |
|                                                                                          | <b>Hs-Tbx21-R</b>       | <b>AAAGTAAAGATATGCGTGTT</b>   |
| <b>Mus musculus actin, beta (Actb)</b>                                                   | <b>Mm-β-ACTIN-F</b>     | <b>AATCTTCCGCCTTAATACT</b>    |
|                                                                                          | <b>Mm-β-ACTIN-R</b>     | <b>AGCCTTCATACATCAAGT</b>     |
| <b>Mus musculus</b><br><b>glyceraldehyde-3-phosphate</b><br><b>dehydrogenase (GAPDH)</b> | <b>Mm-GAPDN-F</b>       | <b>CAGCAACTCCCACTCTTC</b>     |
|                                                                                          | <b>Mm-GAPDN-R</b>       | <b>TGTAGCCGTATTCATTGTCAT</b>  |
| <b>Mus musculus Rps29-like protein</b>                                                   | <b>Mm-RSP29-F</b>       | <b>CAAATACGGGCTGAACAT</b>     |
|                                                                                          | <b>Mm-RSP29-R</b>       | <b>GTCGCTTAGTCCAACCTAA</b>    |

|                                                               |                              |                               |
|---------------------------------------------------------------|------------------------------|-------------------------------|
| <b>Mus musculus Glutaminase</b>                               | <b>Mm-<br/>GLUTAMINASE-F</b> | <b>TGTGCTCTATTGAAGTGA</b>     |
|                                                               | <b>Mm-<br/>GLUTAMINASE-R</b> | <b>CTCAGTGTATTCCGAACT</b>     |
| <b>Mus musculus ATPase</b>                                    | <b>Mm-ATPASE-F</b>           | <b>CCCATTCTTGAGTTTGAG</b>     |
|                                                               | <b>Mm-ATPASE-R</b>           | <b>CTGTCTTCTTTGCTTAGTT</b>    |
| <b>Mus musculus Kv1.3 (KCNA3)</b>                             | <b>Mm-KCNA3-F</b>            | <b>GCACCACGAACAATAACC</b>     |
|                                                               | <b>Mm-KCNA3-R</b>            | <b>AATCAAGGGCATAACACAGA</b>   |
| <b>Mus musculus VCAM-1</b>                                    | <b>Mm-VCAM1-F</b>            | <b>AGACTACACTGATGAAGAA</b>    |
|                                                               | <b>Mm-VCAM1-R</b>            | <b>GAGGCAAACAAGAGATTT</b>     |
| <b>Mus musculus VGlut2 (Slc17a6)</b>                          | <b>Mm-SLC17A6-F</b>          | <b>GCTTCTGGTGTCTTATGA</b>     |
|                                                               | <b>Mm-SLC17A6-R</b>          | <b>CAATGCTCTCCTCTATGTA</b>    |
| <b>Mus musculus VGlut1 (Slc17a7)</b>                          | <b>Mm-SLC17A7-F</b>          | <b>AGTTCTGTCTTCTATGTCTAT</b>  |
|                                                               | <b>Mm-SLC17A7-R</b>          | <b>TGGCATCCTCAATGTATT</b>     |
| <b>Mus musculus VGlut3 (Slc17a8)</b>                          | <b>Mm-SLC17A8-F</b>          | <b>ATAGAGACAAGCATAGGAGAAG</b> |
|                                                               | <b>Mm-SLC17A8-R</b>          | <b>GCATAGACAGGCAAGGAT</b>     |
| <b>Mus musculus Aspartate aminotransferase<br/>(GOT2)</b>     | <b>Mm-GOT2-F</b>             | <b>AGCAGACCACATTACAGAA</b>    |
|                                                               | <b>Mm-GOT2-R</b>             | <b>GGACACGACACTACATCTT</b>    |
| <b>Mus musculus Vesicle-associated<br/>membrane protein 2</b> | <b>Mm-VAMP2-F</b>            | <b>CGCAAATACTGGTGGA</b>       |
|                                                               | <b>Mm-VAMP2-R</b>            | <b>ATGATGATGATGAGGATGATG</b>  |
| <b>Mus musculus Vesicle-associated<br/>membrane protein 3</b> | <b>Mm-VAMP3-F</b>            | <b>AAGTATTGGTGGAAGAAC</b>     |
|                                                               | <b>Mm-VAMP3-R</b>            | <b>CGATGATGATGATGACAA</b>     |
| <b>Mus musculus Vesicle-associated<br/>membrane protein 4</b> | <b>Mm-VAMP4-F</b>            | <b>AGGAACTGGACTACTAATC</b>    |
|                                                               | <b>Mm-VAMP4-R</b>            | <b>ATGCTCTTACTATCACTCA</b>    |
| <b>Mus musculus Synaptosomal-associated<br/>protein 23</b>    | <b>Mm-SNAP23-F</b>           | <b>CGTCTCTTCATCTCTTCATT</b>   |
|                                                               | <b>Mm-SNAP23-R</b>           | <b>AACCAACCAACCAATACC</b>     |
| <b>Mus musculus RORgt</b>                                     | <b>Mm-RORgt-F</b>            | <b>GGATAGAGATAGGATGAC</b>     |
|                                                               | <b>Mm-RORgt-R</b>            | <b>GAAAGGACTGTTATTAGC</b>     |
| <b>Mus musculus Tbet</b>                                      | <b>Mm-Tbet-F</b>             | <b>GTGGAGGTGAATGATGGA</b>     |
|                                                               | <b>Mm-Tbet-R</b>             | <b>ATCTCTGCGTTCTGGTAG</b>     |

The primers listed were designed using Beacon Designer Software for designing primers especially for qRT-PCR experiments.

**A**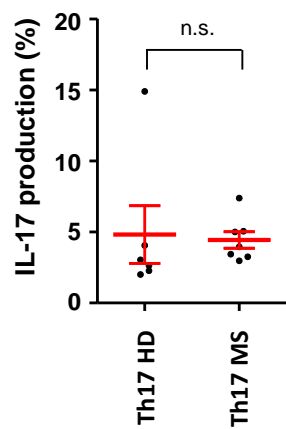**B**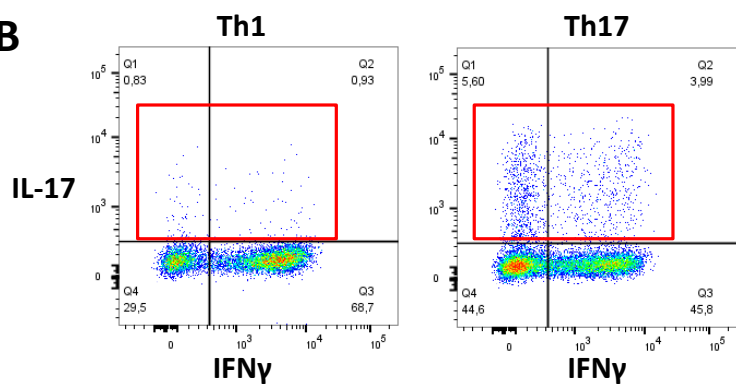**C**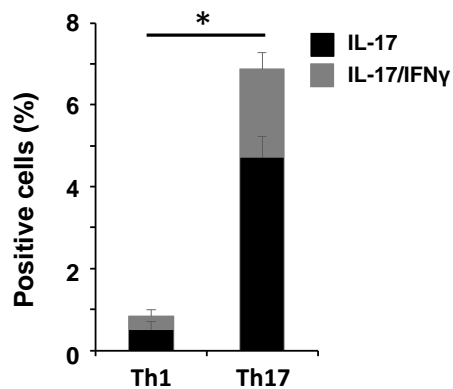**D**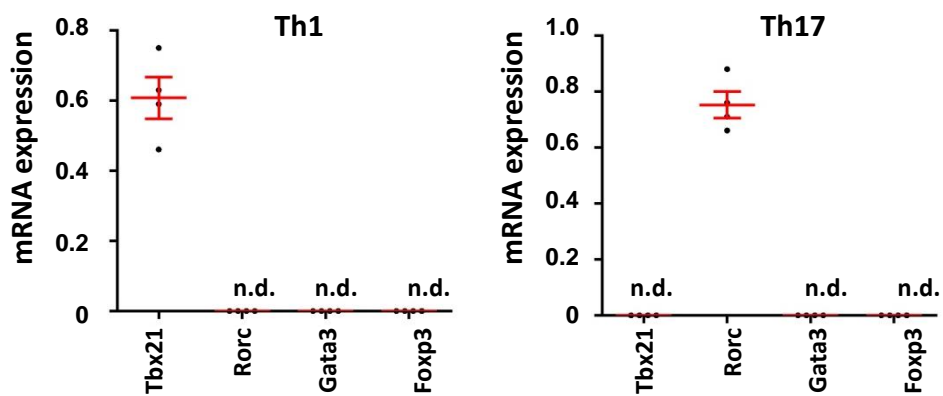

**A**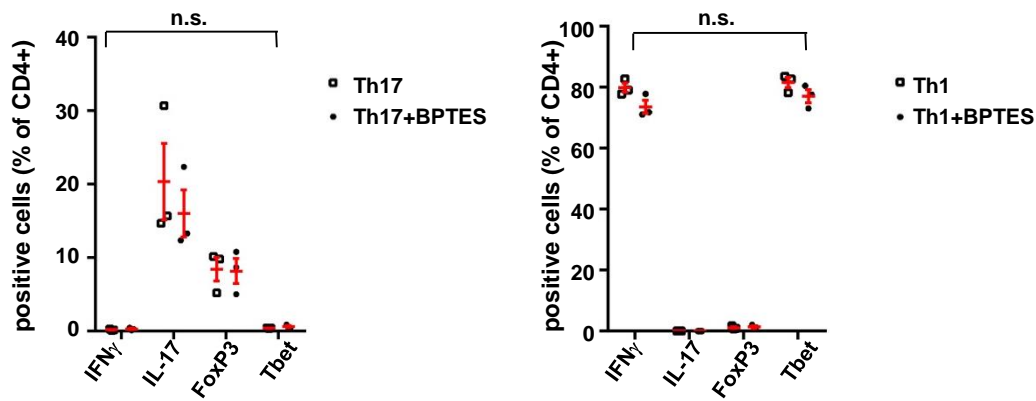**B**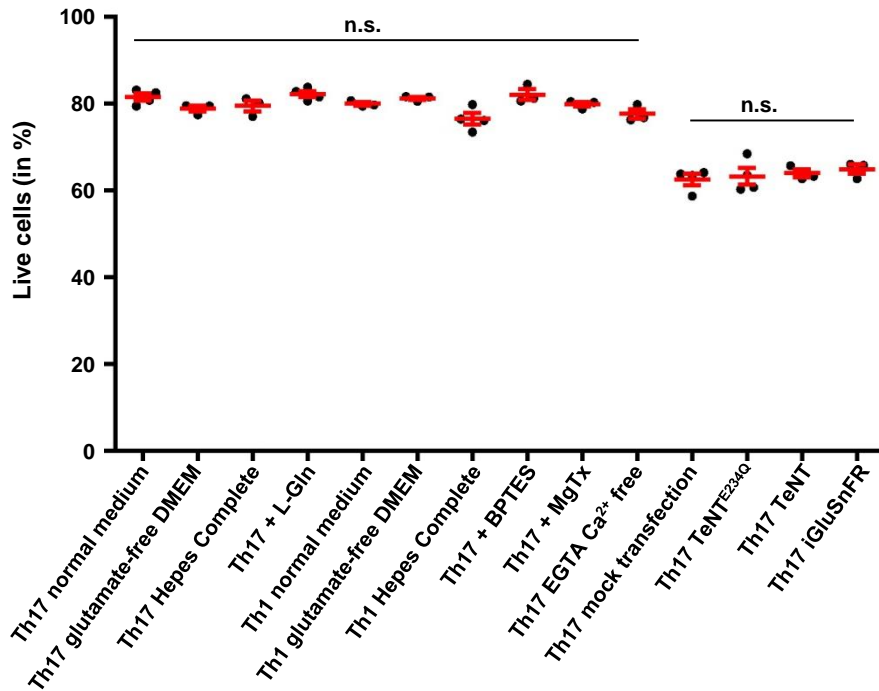

**A**

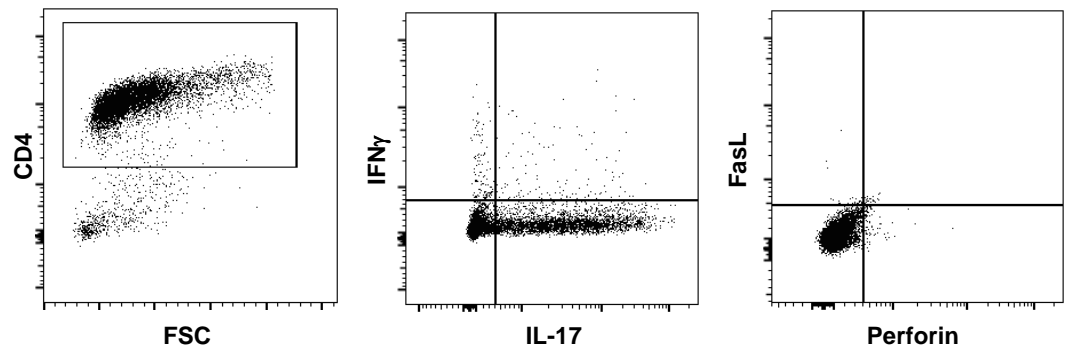

**B**

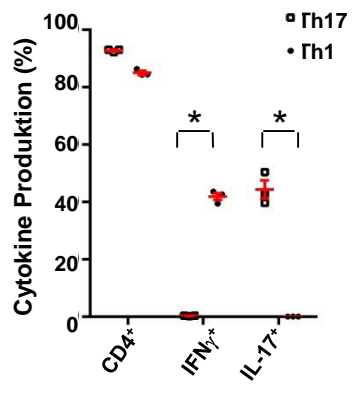

**C**

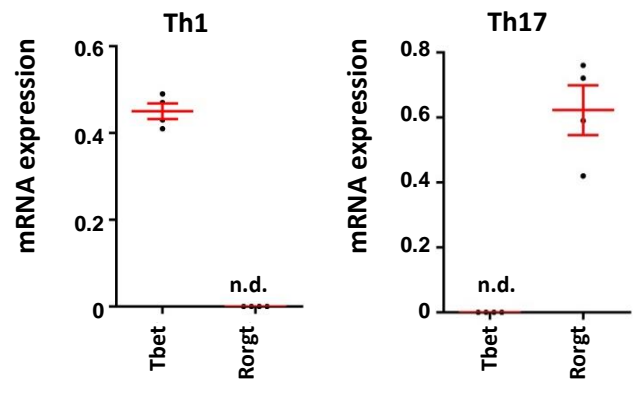

**A**

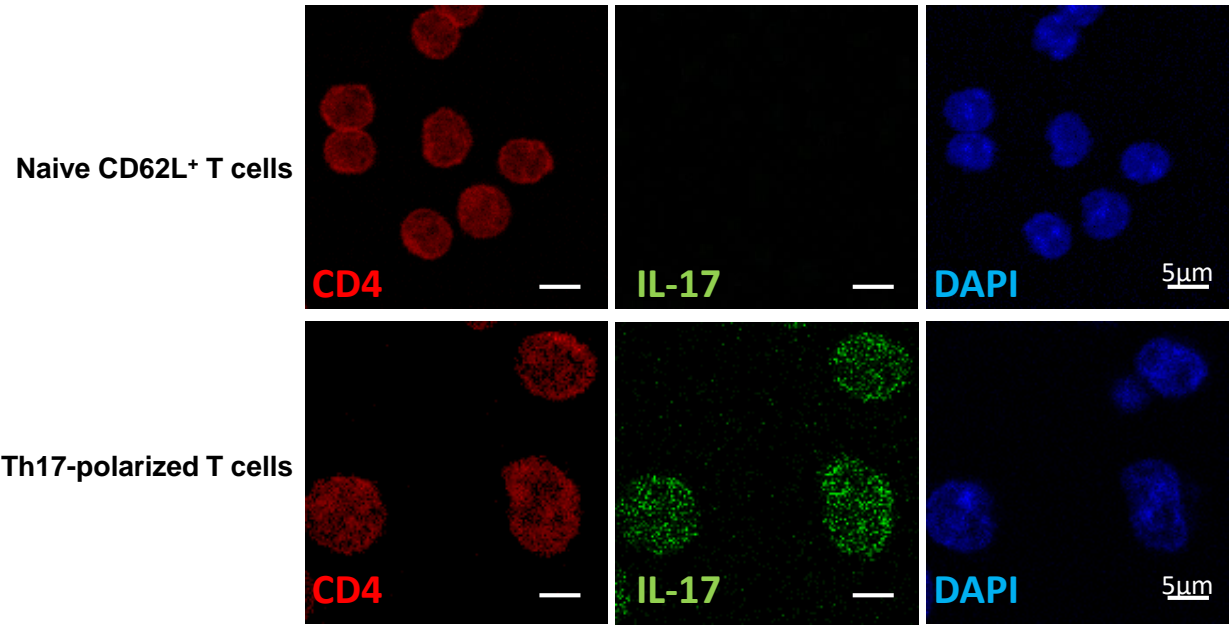

**B**

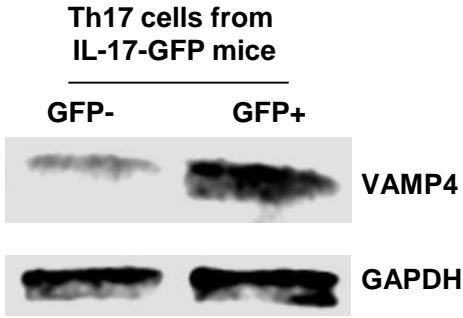

**A**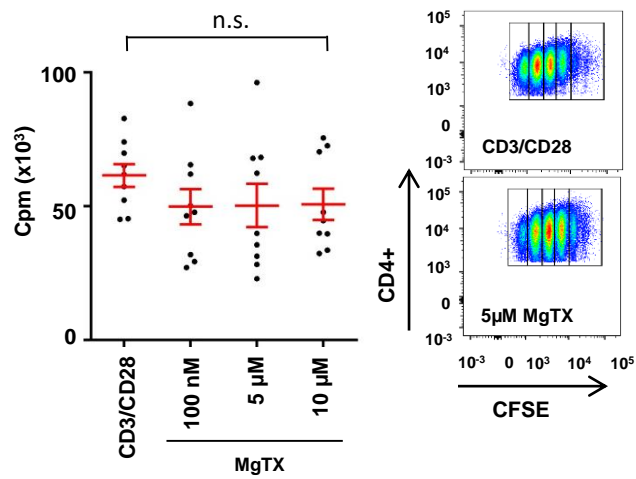**B**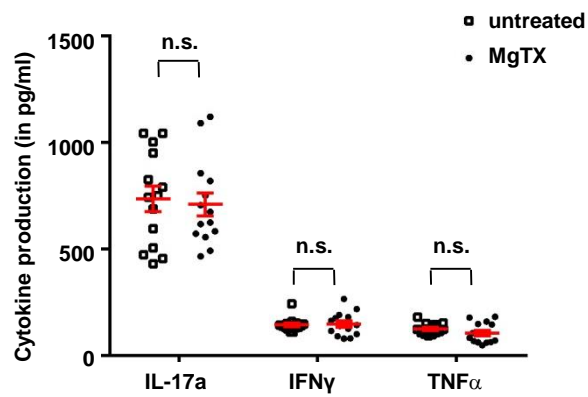**C**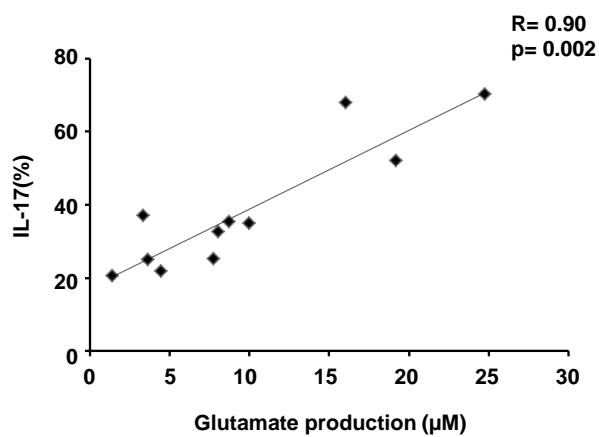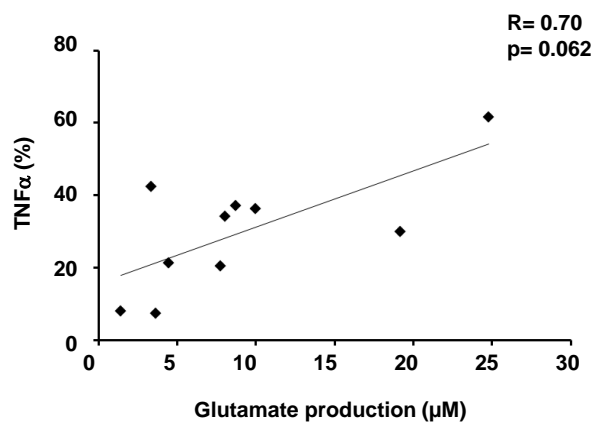**D**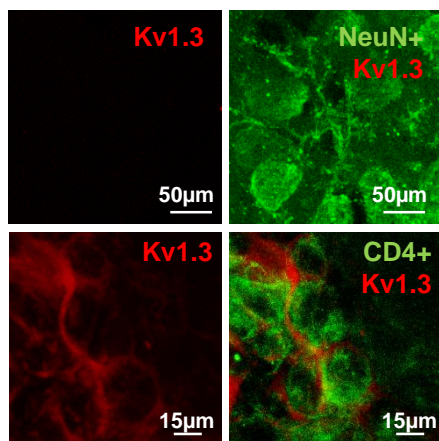**E**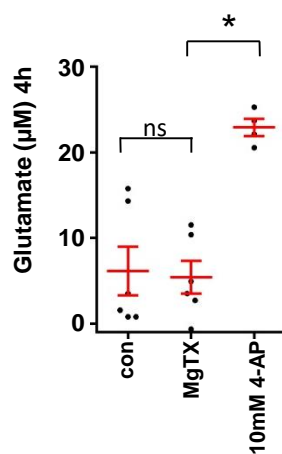

A

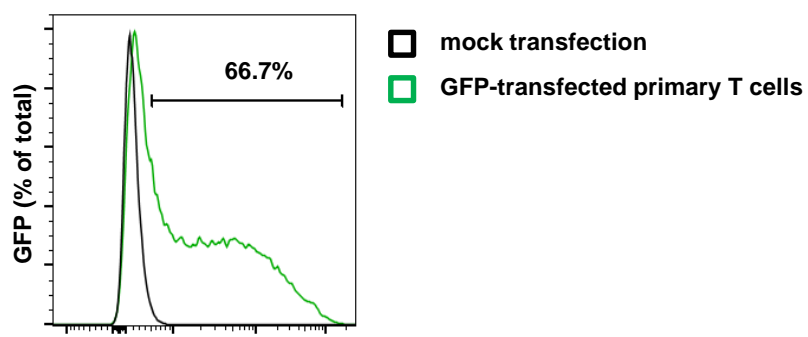

A

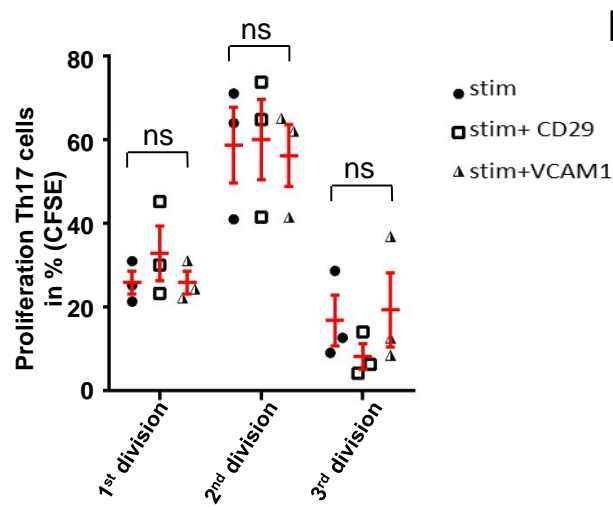

B

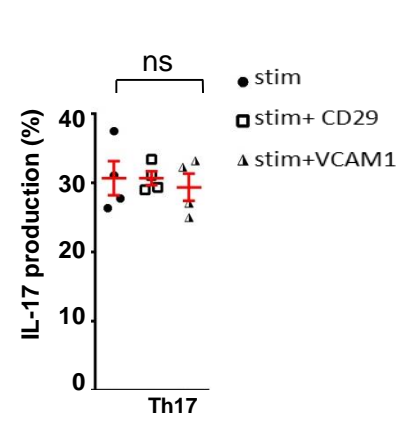

Supplement: jci-130-126381-s131.pdf [file jci-130-126381-s131.pdf]
